# Supplementary material for: Tigecycline Opposes Bortezomib Effect on Myeloma Cells Decreasing Mitochondrial Reactive Oxygen Species Production
Source: MDPI journal article supplement (doi:10.3390/ijms25094887), 2024-04-30
Supplement: s1 [file s1]

| PARAMETERS                       | METHOD                     | MOLECULAR MARKER                                               | ASSAY SUMMARY                                                                                                                                                                                              | MATERIALS                                                                                                               |
|----------------------------------|----------------------------|----------------------------------------------------------------|------------------------------------------------------------------------------------------------------------------------------------------------------------------------------------------------------------|-------------------------------------------------------------------------------------------------------------------------|
| Cell viability and rate of death | Flow cytometry             | Phosphatidylserine ( <i>Annexin V</i> )<br>DNA ( <i>7AAD</i> ) | <i>Annexin V</i> is measured via PE channel (585-42 nm) and <i>7AAD</i> is measured via PC5.5 (690-50 nm)                                                                                                  | <i>PE annexin V Apoptosis Detection Kit (BD Pharmingen)</i>                                                             |
| Cell cycle                       | Flow cytometry             | BrDU ( <i>anti APC-BrDU</i> )<br>DNA ( <i>7AAD</i> )           | Anti-BrDU fluorophore is measured via APC channel (660-20 nm) and <i>7AAD</i> is measured via PC5.5 (690-50 nm)                                                                                            | <i>APC BrdU Flow kit (BD Pharmingen)</i>                                                                                |
| Mitochondrial levels             | Flow cytometry             | Mitochondrial mass                                             | Live cells are stained with a dye that accumulates in the mitochondria, then measured via FITC channel (516 nm).                                                                                           | <i>MitoTracker Green FM (Invitrogen)</i>                                                                                |
| Autophagy rate levels            | Flow cytometry             | Monodansyl cadaverine ( <i>MDC</i> )                           | <i>MDC</i> is marked with a fluorophore and then measured via FITC channel (525-40 nm)<br><i>Rapamycin</i> is used as a positive control.                                                                  | <i>Autophagy Assay Kit ab139484 (Abcam)</i>                                                                             |
|                                  | Western Blot               | LC3B                                                           | Proteins extracts are obtained with lysis buffer and separated by electrophoresis. Samples are transferred to a PVDF membraned and incubated with antibody. Visualisation is performed using ECL at 16 kDa | 3868<br>( <i>Cell Signaling Technology</i> )                                                                            |
|                                  | Quantitative Real Time PCR | <i>MAP1LC3B</i><br><i>MFN2</i><br><i>PINK1</i><br><i>ULK1</i>  | cDNA samples were obtained from mRNA by retrotranscription, amplified real time PCR and analysed using the $2^{-\Delta\Delta CT}$ method (RT-qPCR).                                                        | <i>Hs00917682_m1</i><br><i>Hs00208382_m1</i><br><i>Hs00260868_m1</i><br><i>Hs00177504_m1</i><br>( <i>ThermoFisher</i> ) |
| Oxidative mitochondrial state    | Flow cytometry             | Superoxide radicals in the mitochondria                        | <i>MitoSOX Red</i> oxidises with mitochondrial superoxide and the fluorescence is measured via ECD channel (610 nm).                                                                                       | <i>MitoSOX (Invitrogen)</i>                                                                                             |
|                                  | Western Blot               | Mn-SOD ( <i>SOD2</i> )                                         | Proteins extracts are obtained with lysis buffer and separated by electrophoresis. Samples are transferred to a PVDF membraned and incubated with antibody. Visualisation is performed using ECL at 22 kDa | 06-984 ( <i>Merck</i> )                                                                                                 |

|                                                 |                            |                                                                                                                                                                                  |                                                                                                                                                                                                                           |                                                                                                                                                                                        |
|-------------------------------------------------|----------------------------|----------------------------------------------------------------------------------------------------------------------------------------------------------------------------------|---------------------------------------------------------------------------------------------------------------------------------------------------------------------------------------------------------------------------|----------------------------------------------------------------------------------------------------------------------------------------------------------------------------------------|
|                                                 | Quantitative Real Time PCR | <i>SOD1</i><br><i>SOD2</i><br><i>NFE2L2</i><br><i>G6PD</i>                                                                                                                       | RT-qPCR, as before                                                                                                                                                                                                        | <i>Hs00167309_m1</i><br><i>Hs00167309_m1</i><br><i>Hs00232352_m1</i><br><i>Hs00166169_m1</i><br>(ThermoFisher)                                                                         |
| Cell hydrogen peroxide levels and antioxidants  | Flow cytometry             | H <sub>2</sub> O <sub>2</sub>                                                                                                                                                    | Cells are stained prior to treatment and then measured via Pacific Blue channel (450 nm)                                                                                                                                  | <i>Cell Meter Intracellular Fluorimetric Hydrogen Peroxide</i><br>(AAT Bioquest)                                                                                                       |
|                                                 | Quantitative Real Time PCR | <i>CAT</i><br><i>GPX1</i><br><i>PRDX1</i><br><i>PRDX4</i><br><i>PRDX5</i><br><i>TXN</i><br><i>TXN2</i>                                                                           | RT-qPCR, as before                                                                                                                                                                                                        | <i>Hs00156308_m1</i><br><i>Hs00829989_gH</i><br><i>Hs00602020_mH</i><br><i>Hs01056076_m1</i><br><i>Hs00201536_m1</i><br><i>Hs00828652_m1</i><br><i>Hs00429399_g1</i><br>(ThermoFisher) |
| Mitochondrial homeostasis and energy production | Quantitative Real Time PCR | <i>ATP5B</i><br><i>MYC</i><br><i>POLRMT</i><br><i>TFAM</i><br><i>TFB1M</i>                                                                                                       | RT-qPCR, as before                                                                                                                                                                                                        | <i>Hs00969569_m1</i><br><i>Hs00153408_m1</i><br><i>Hs04187596_g1</i><br><i>Hs01082775_m1</i><br><i>Hs01084404_m1</i><br>(ThermoFisher)                                                 |
|                                                 | SeaHorse                   | Complex I<br>( <i>Rotenone</i> )<br>Complex III<br>( <i>Antimycin A</i> )<br>Complex V<br>( <i>Oligomycin</i> )<br>Proton gradient in mitochondrial membranes<br>( <i>FCCP</i> ) | Cells are treated with modulators of respiration at different time points to measure different aspects of mitochondrial performance                                                                                       | <i>Agilent SeaHorse</i>                                                                                                                                                                |
|                                                 | Western Blot               | Electron Transport Chain (Complex I to V)                                                                                                                                        | Proteins extracts are obtained with lysis buffer and separated by electrophoresis. Samples are transferred to a PVDF membraned and incubated with antibody. Visualisation is performed via fluorescence from 10 to 50 kDa | <i>OXPHOS</i><br><i>45-8199 (Invitrogen)</i>                                                                                                                                           |
